# Supplementary material for: A PMMA-Based Microfluidic Device for Human Sperm Evaluation and Screening on Swimming Capability and Swimming Persistence
Source: MDPI journal article supplement (doi:10.3390/mi11090793), 2020-08-21
Supplement: s1 [file s1]

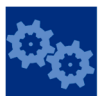

## Supplementary materials: A PMMA-Based Microfluidic Device for Human Sperm Evaluation and Screening on Swimming Capability and Swimming Persistence

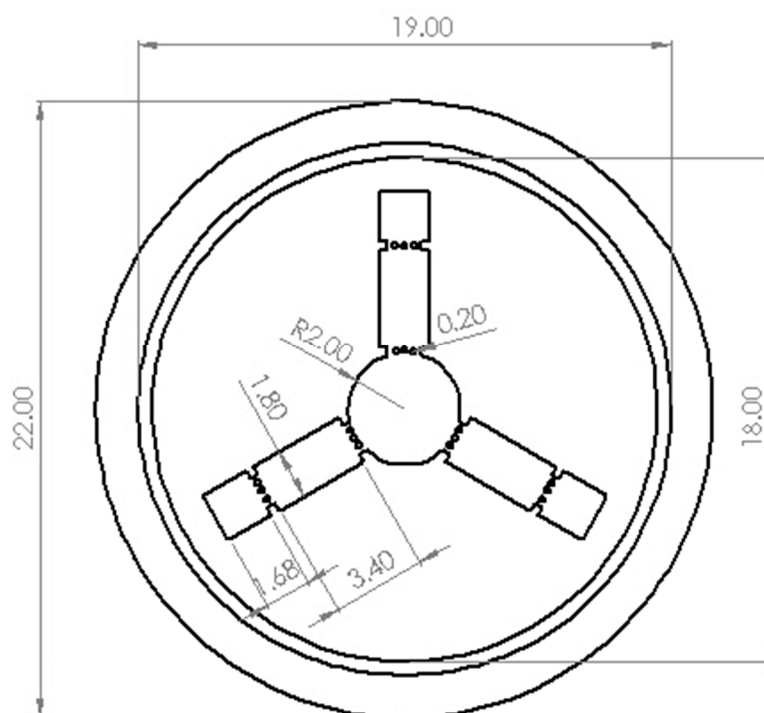

**Figure S1.** Dimensions of the PMMA-based microfluidic device. (in mm).
